# Supplementary material
Source: PubMed Central journal article supplement (PMC2940508)
Supplement: en.2010-0440_1.pdf [file en.2010-0440_1.pdf]

## SUPPLEMENTAL FIGURES

### **Suppl Fig. 1 Gestational time course of EPC development in HSD, DSS, and BN**

**rats.** Trophoblast cells were identified by cytokeratin immunostaining of HSD (*Panels A, D, G*), DSS (*Panels B, E, H*) and BN (*Panels C, E, I*) rat tissue sections from gestation d7.5 (*Panels A-C*), d8.5 (*Panels D-F*), and d9.5 (*Panels G-I*) placentation sites. Bars = 500  $\mu\text{m}$ . EPC: ectoplacental cone; Emb: embryo; MD: mesometrial decidua; AD: antimesometrial decidua; Epi: epiblast; Cho: chorion.

### **Suppl Fig. 2 NK cells and vasculature within the placentation sites of gestation**

**d8.5 DSS (*Panels A, C, E*) and BN (*Panels B, D, F*) rats.** Uterine NK cell distributions were detected by perforin immunoreactivity (*Panels A and B*) and vasculature was assessed by immunostaining for smooth muscle actin (ACTA2; *Panels C and D*) and a rat endothelial cell antigen (RECA1; *Panels E and F*). Bars = 500  $\mu\text{m}$ . MD: mesometrial decidua; EPC: ectoplacental cone.

### **Suppl Fig. 3 Proliferation and cell death in the decidual compartments of**

**gestation d8.5 DSS (*Panels A and C*) and BN (*Panels B and D*) rats.** Proliferation was monitored by MKI67 immunoreactivity (*Panels A and B*) and cell death as assessed by TUNEL positive cells (*Panels C and D*). EPC: ectoplacental cone; Emb: embryo; MD: mesometrial decidua; AD: antimesometrial decidua.

### **Suppl Fig. 4 In vitro differentiation of DSS and BN rat uterine stromal cells.**

Morphologies of DSS and BN uterine stromal cells following 72 h of in vitro

differentiation are shown in the upper panels. Transcript levels for decidualization-associated genes were measured by qRT-PCR and are presented in the bar graphs (A: *Prl6a1*; B: *Prl8a2*, C: *Prl3c1*; D: *Gja1*).

**Suppl Fig. 5 Expression of transcripts for the decidual PRL family in decidual tissue from d8.5 pseudopregnant DSS and BN rats.** Decidual transcript levels were monitored by qRT-PCR. A: *Prl*; B: *Prl6a1*; C: *Prl8a2*; D: *Prl3c1*.

**Suppl Fig. 6 Expression of transcripts for steroidogenic steroid metabolizing enzymes in decidual tissue from d8.5 pseudopregnant DSS and BN rats.** Decidual transcript levels were determined by qRT-PCR. A: *Cyp11a1*; B: *Cyp17a1*; C: *Hsd17b2*; D: *Hsd3b1*; E: *Cyp19a1*; F: *Akr1c18*.

**Suppl Fig. 7 Evaluation of mammary gland *Areg* responsiveness to P4.** Rats from DSS and BN strains were ovariectomized, rested for two weeks, and acutely treated with a subcutaneous injection of P4 (40 mg/kg body weight) or vehicle. Twenty-four h post injection rats were sacrificed, mammary gland collected, and *Areg* gene expression assessed by qRT-PCR. Data was analyzed with the Wilcoxon rank sum test, \*P<0.01, DSS control: n=10, DSS P4-treated: n=12, BN control: n=7, BN P4-treated: n=7.

**Suppl Fig. 8 *Pgr* and *Ncoa1* gene expression in gestation d4.5 rat uterus.** Transcript levels for total *Pgr* (Panel A), *Pgr B* (Panel B), and *Ncoa1* (Panel C) in uteri of gestation d4.5 DSS and BN rats. Wilcoxon rank sum test. \*P<0.05, n=8 for each group.

**Suppl Fig. 9 PGR Immunolocalization in gestation d4.5 and d8.5 uterine tissues.**

PGR was detected by immunohistochemistry in gestation d4.5 (Panels A and B) and d8.5 (Panels C-H) of DSS (Panels A, C, E, G) and BN (Panels B, D, F, H) rat uterine tissues. The schematic in the center of the figure shows the location of the gestation d8.5 tissue sections presented. *Panels C and D*, mesometrial; *Panels E and F*, central; *Panels G and H*, antimesometrial. EPC: ectoplacental cone; Dec: decidua; Emb: embryo.

**Suppl Fig. 10 *Pgr* promoter analyses.** *Panel A*, Sequence analysis of *Pgr* regulatory DNA from DSS, F344, and BN rat strains (GenBank Accession: HM037358, HM037359, HM037360). *Pgr* promoter-reporter constructs (*Panel B*) were evaluated in rat U1 uterine stromal cells (*Panel C*) and human MCF7 breast cancer cells (*Panel D*). Note that each rat *Pgr* promoter reporter construct exhibited similar activities in the progesterone responsive rat U1 uterine stromal and human MCF7 breast cancer cells.

HSD

DSS

BN

day 7.5

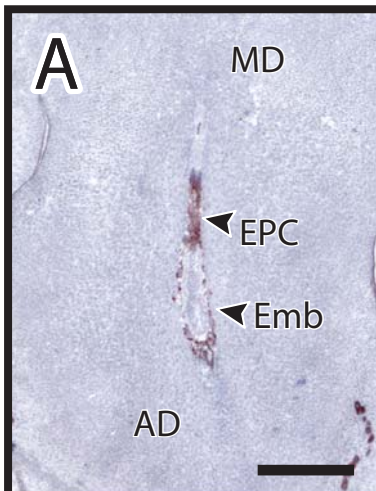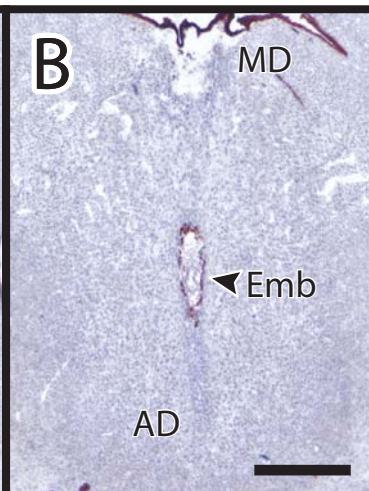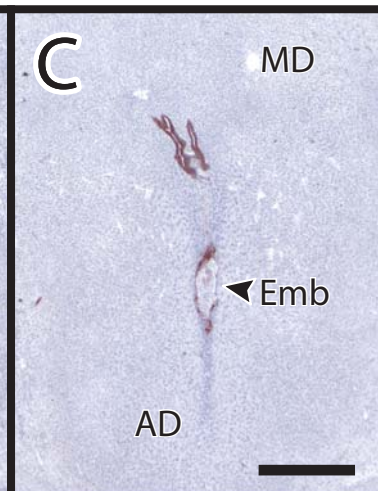

day 8.5

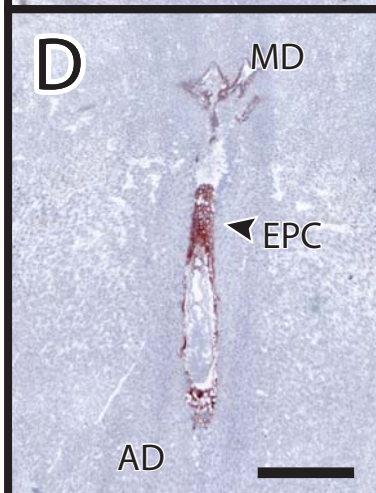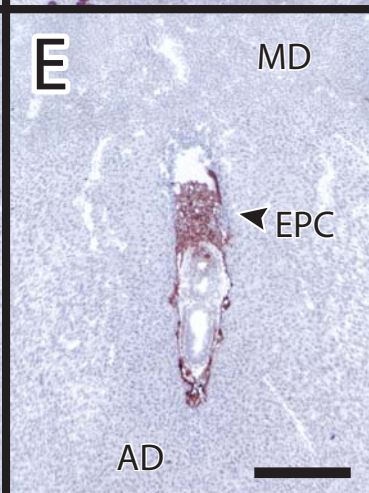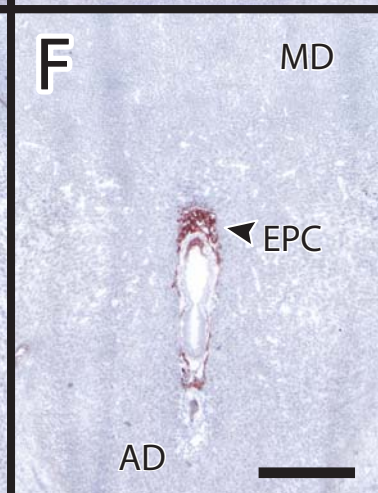

day 9.5

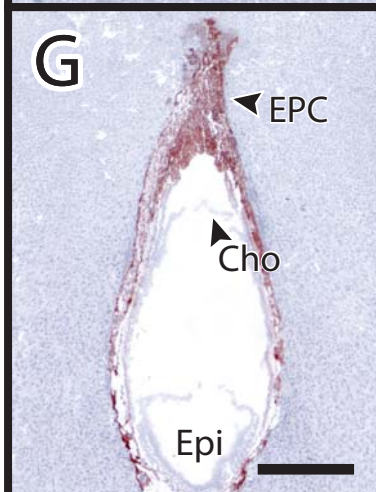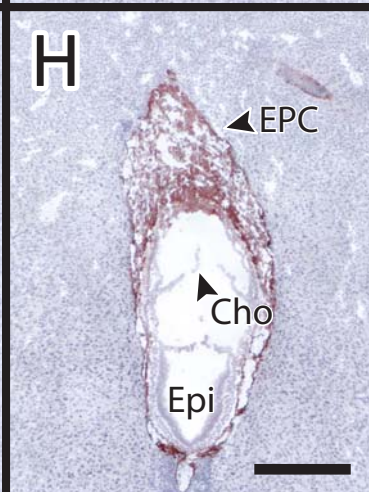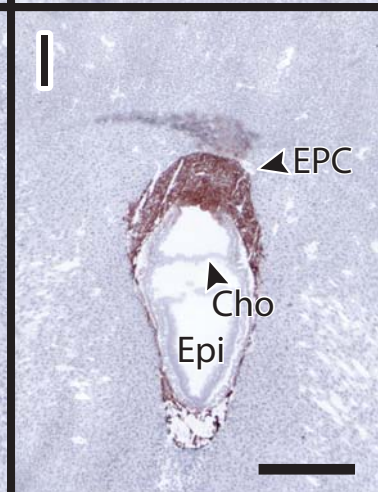

DSS

BN

Perforin

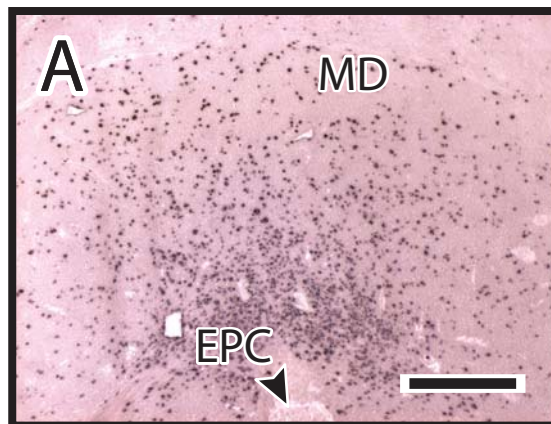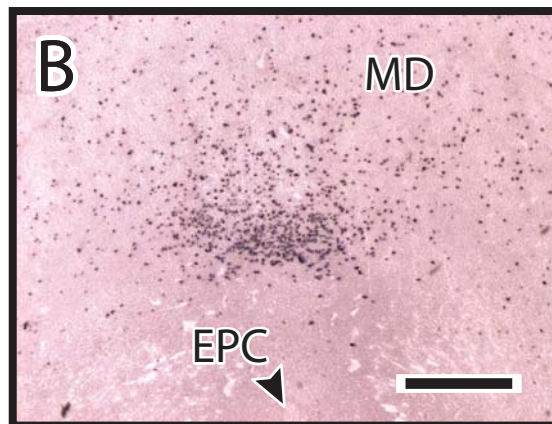

ACTA2

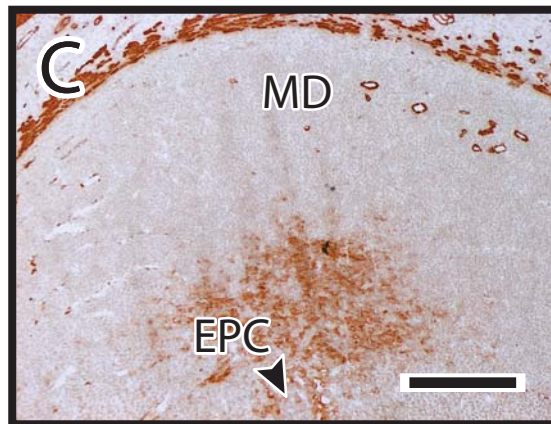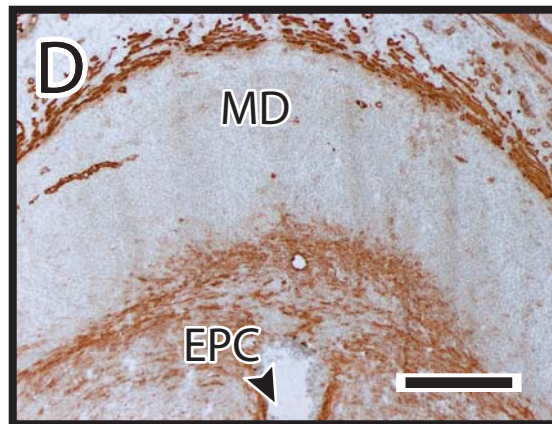

RECA1

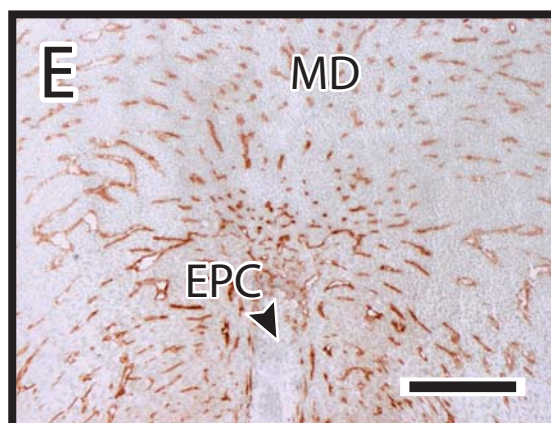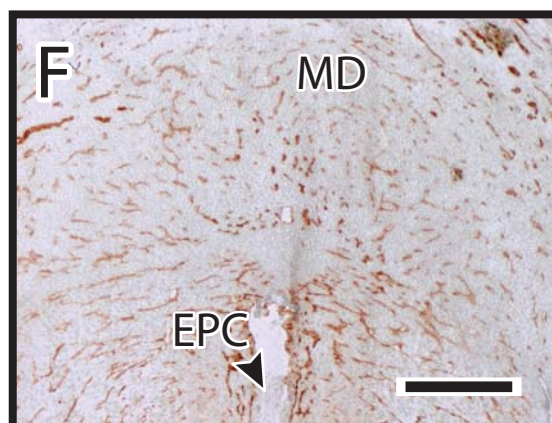

DSS

BN

MKI67

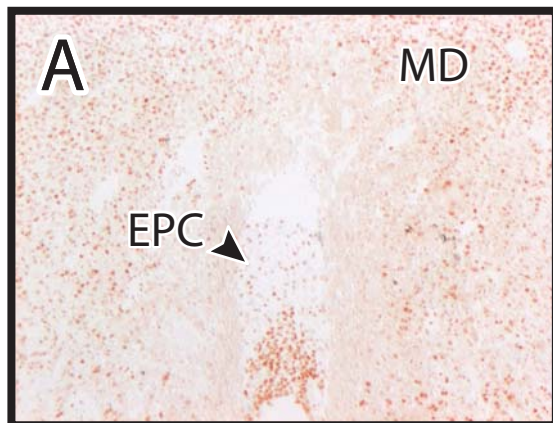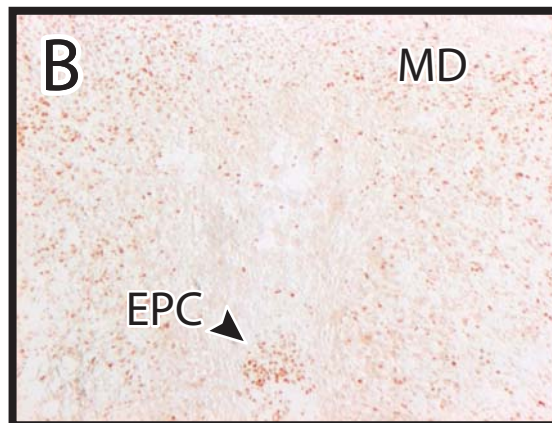

TUNEL

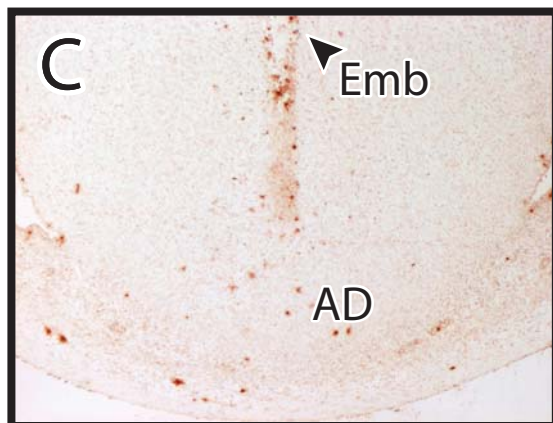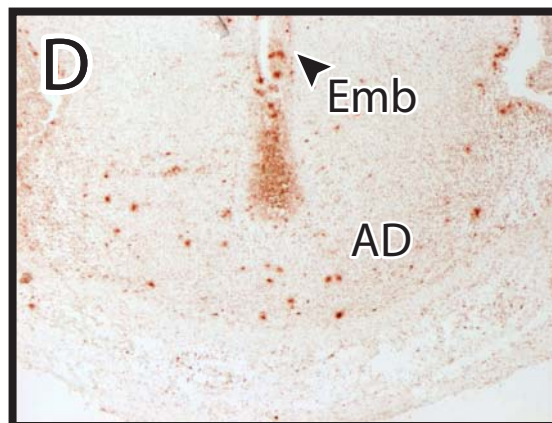

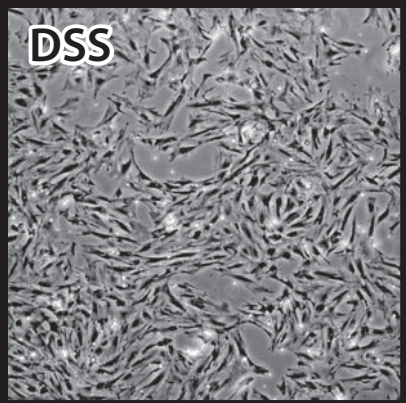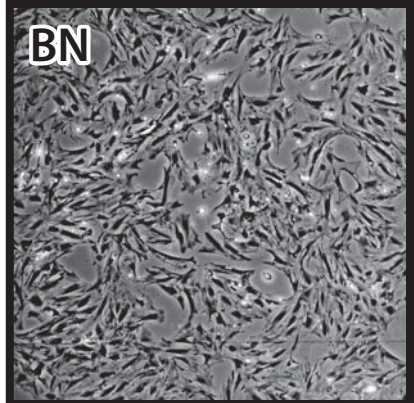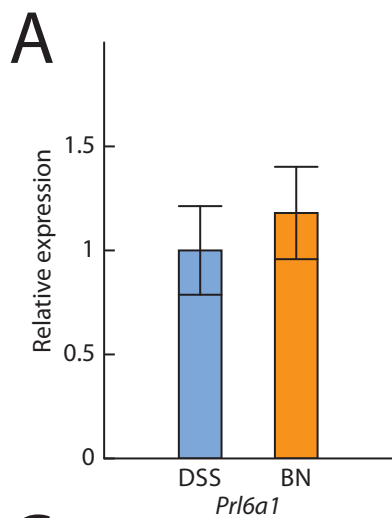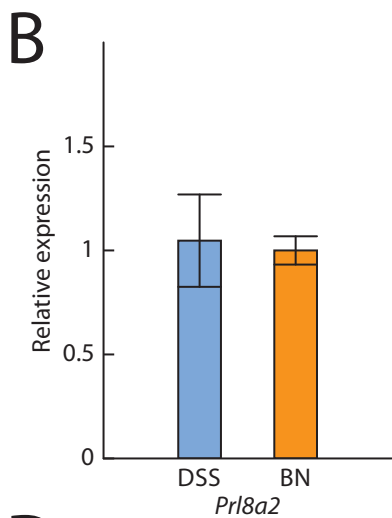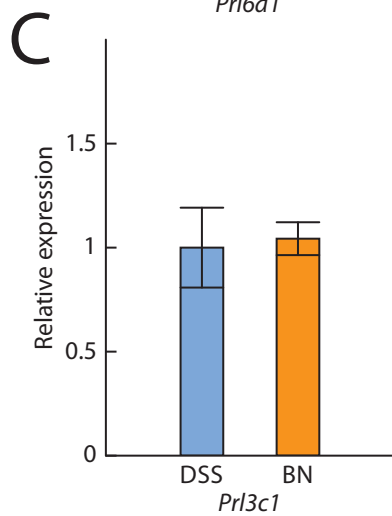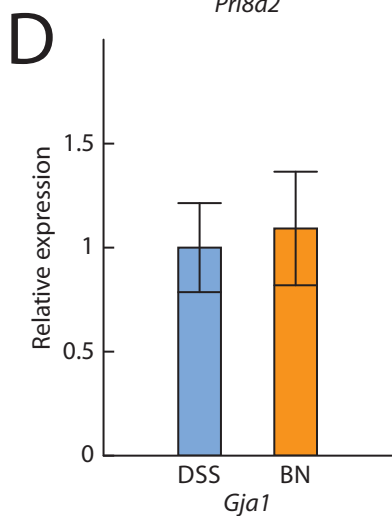

**A**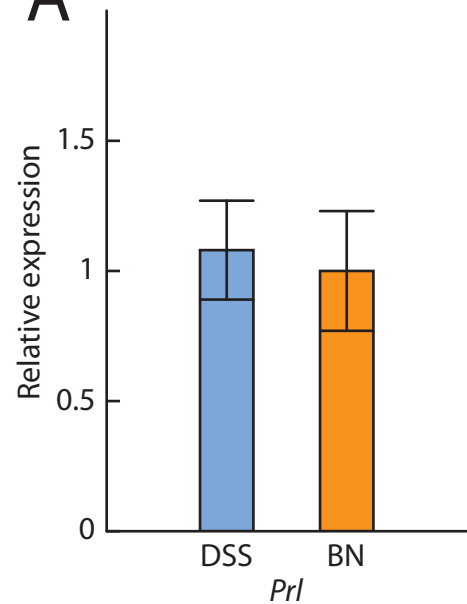**B**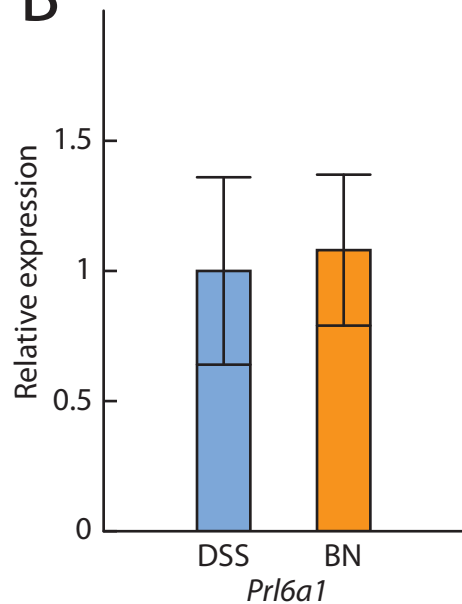**C**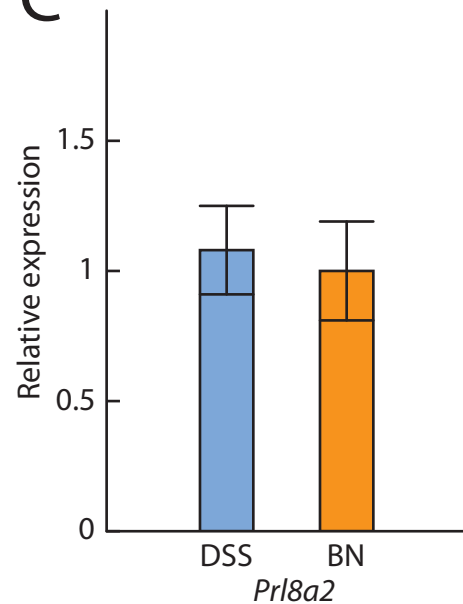**D**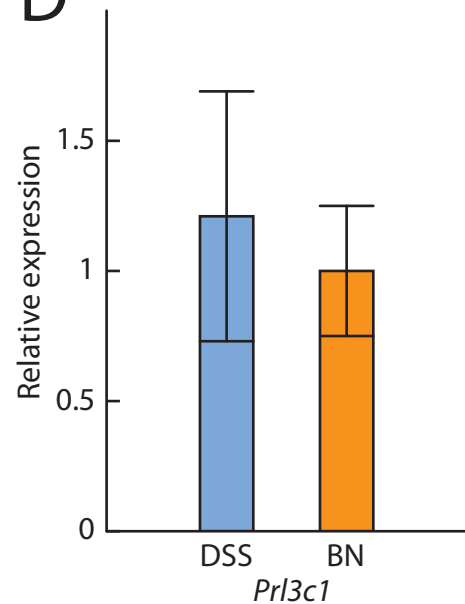



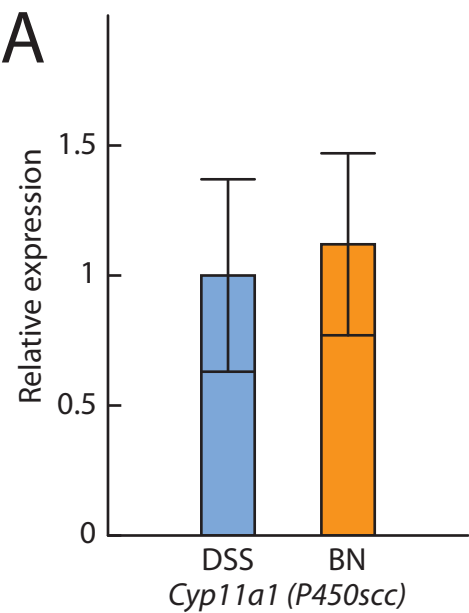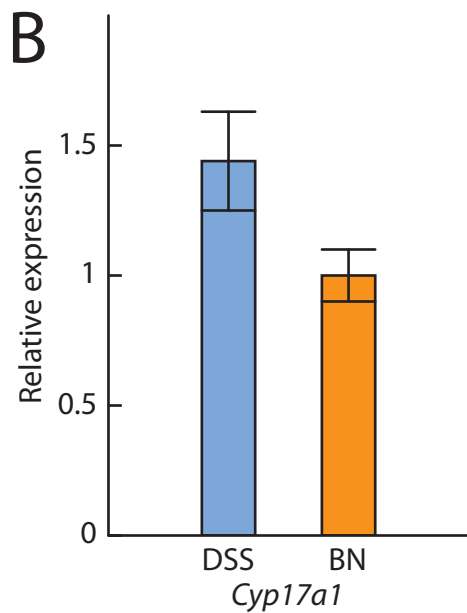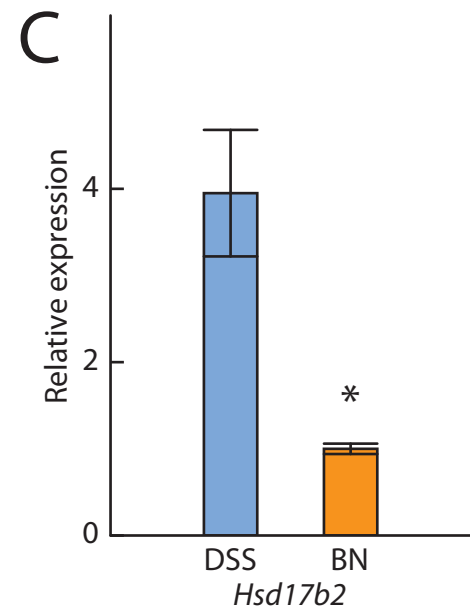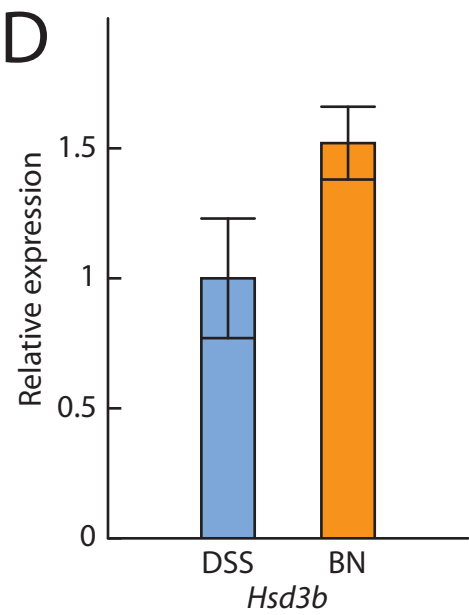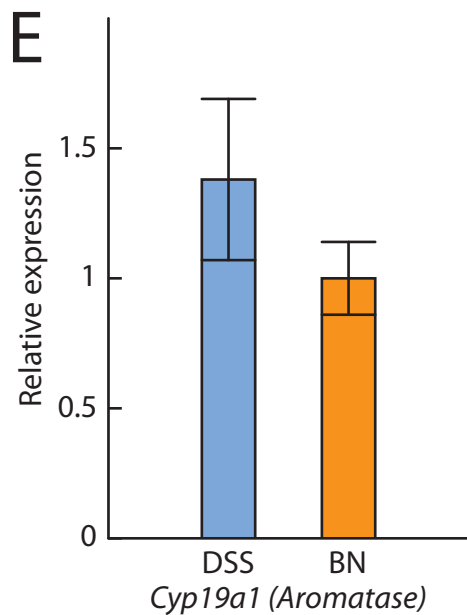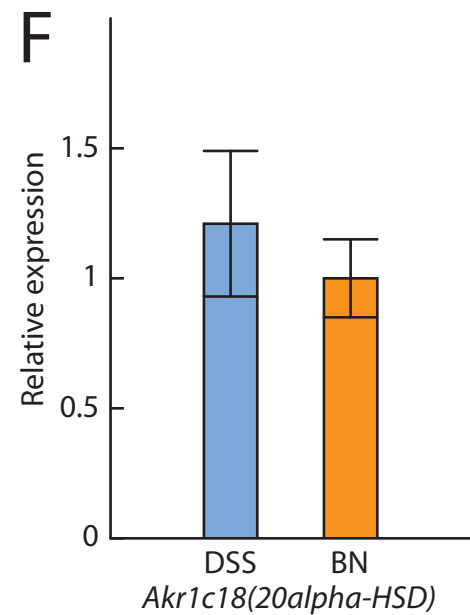

**A**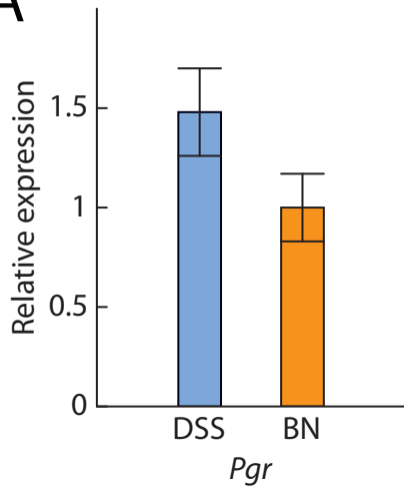**B**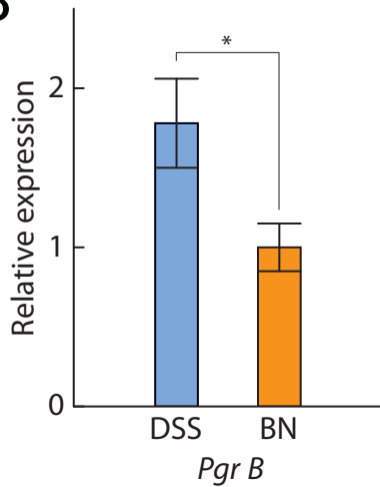**C**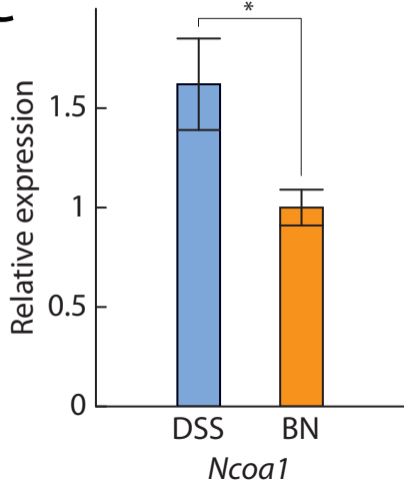

Relative expression

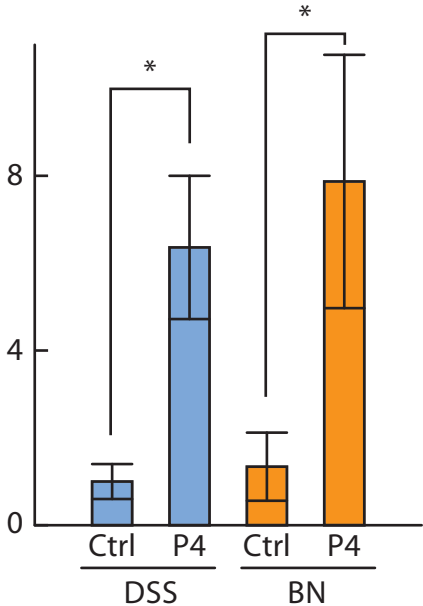

*Areg*

DSS

BN

Day 4.5 Uterus

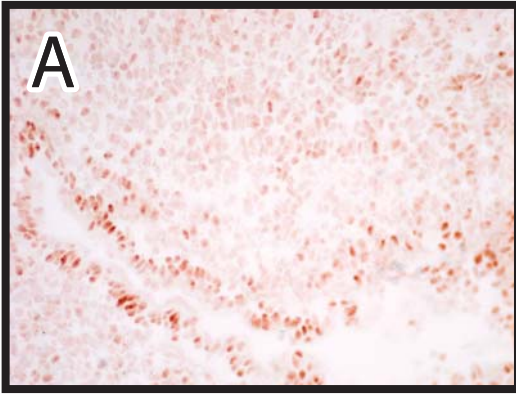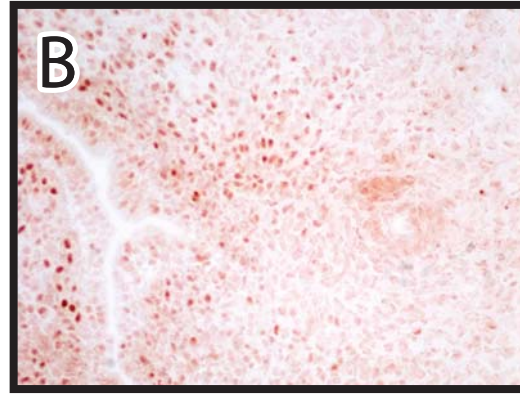

Day 8.5 Implantation Site

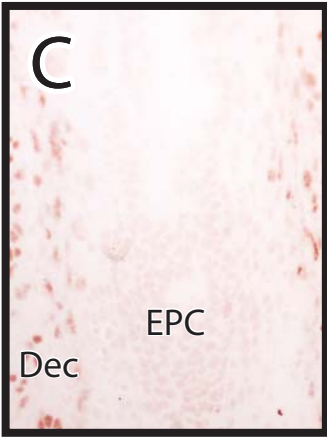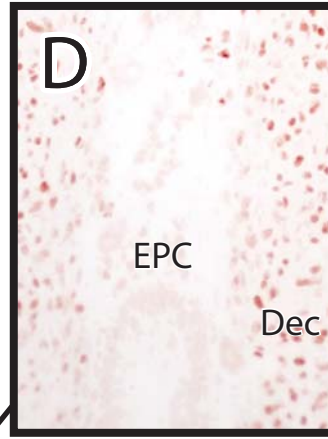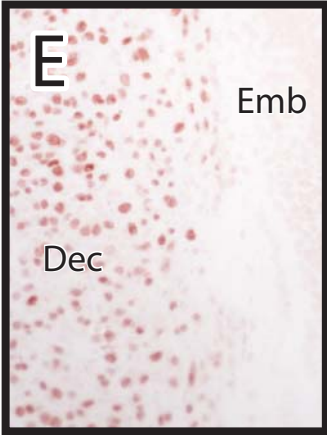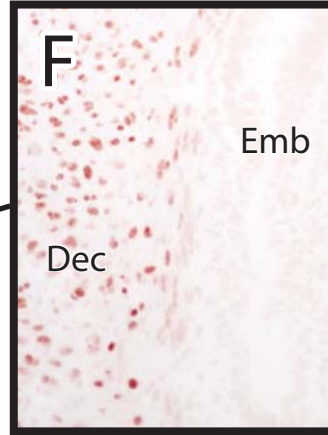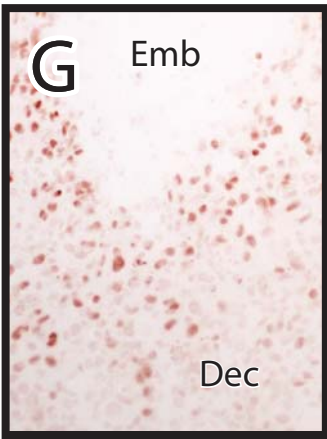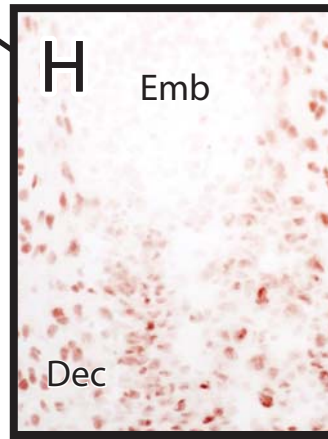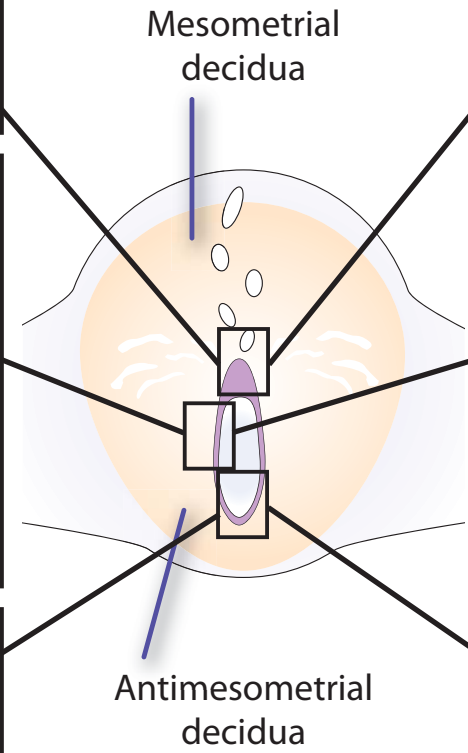

A

-547 to -532 nt insertion

BN -1308...//...gtagt**t**tgcc...//...gggc**a**tgct...//...tatagaata...//...gctc**a**ttag...//...ttgg**t**actatatgcacagtgacac...//  
 DSS -1308...//...gtagc**t**tgcc...//...gggc**g**tgct...//...tata**a**aata...//...gctc**g**ttag...//...ttgg.....**c**.....acac...//  
 Fisher -1308...//...gtagc**t**tgcc...//...gggc**g**tgct...//...tata**a**aata...//...gctc**g**ttag...//...ttgg.....**c**.....acac...//

BN /...aaaa**a**tttg...//...tgct**t**cagc...//...aggg**a**agtc...//...cgcb**t**atac...//...gagtc**c**gaag...+1060  
 DSS /...aaaa**a**tttg...//...tgct**c**cagc...//...aggg**g**agtc...//...cgcc**a**atac...//...gagtg**g**gaag...+1060  
 Fisher /...aaaa**a**tttg...//...tgct**c**cagc...//...aggg**g**agtc...//...cgcc**a**atac...//...gagtg**g**gaag...+1060

B

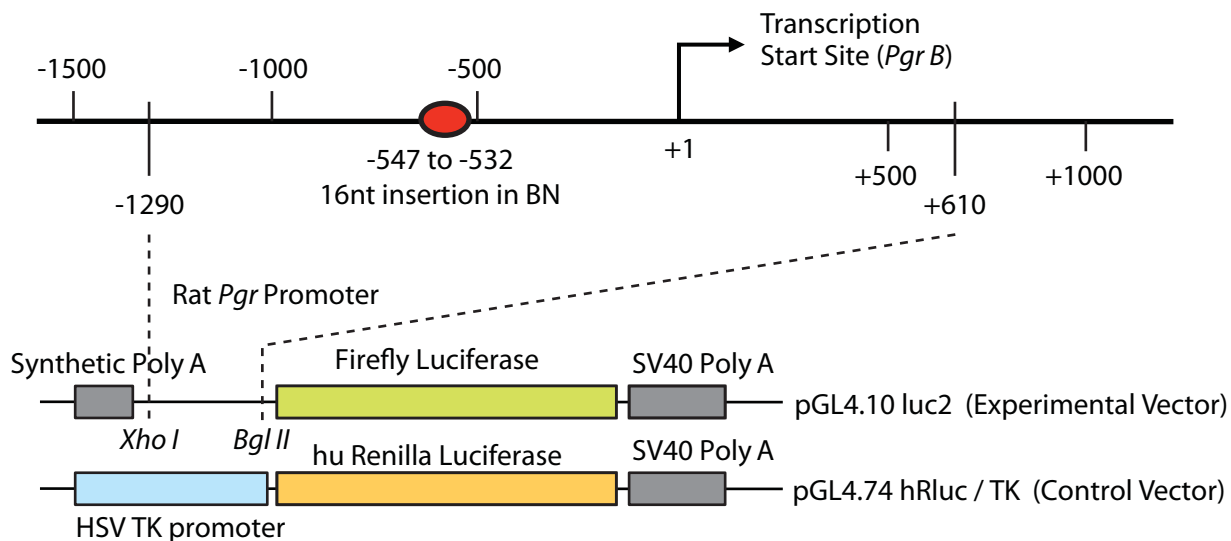

C

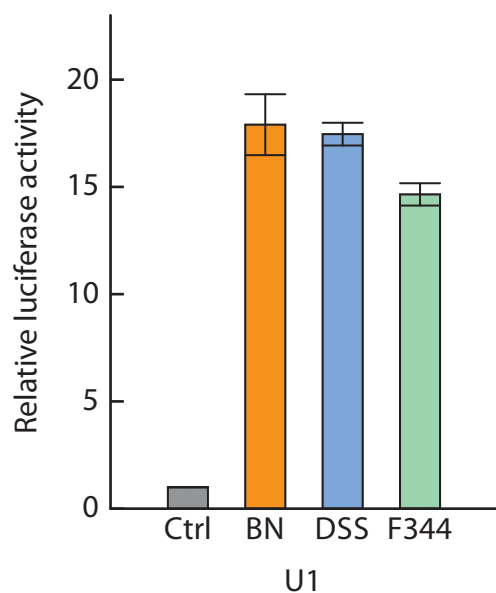

D

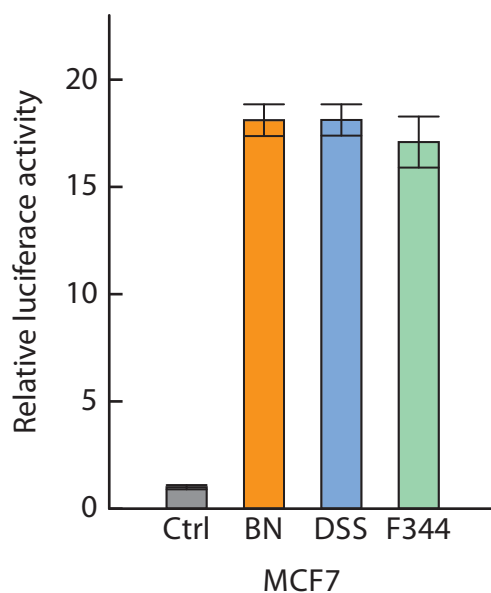

**Suppl Table 1. Primers used for qRT-PCR analyses of decidual gene expression**

| <b>Symbol</b> | <b>Accession No.</b> | <b>Forward primer</b>  | <b>Reverse primer</b>   |
|---------------|----------------------|------------------------|-------------------------|
| <i>Fmo3</i>   | NM_053433            | TGACGAGAAAATGGGAAGA    | ACCTGGGGTCCTTGAGAAAC    |
| <i>Car4</i>   | NM_019174            | CTCTACTGGCGCTGGCTTAC   | TCTCCAGTCCATTGTTGAGG    |
| <i>Fubp3</i>  | BF282112             | GTTTCAAACGAGCGTTCCTC   | AAAGGGATGATTTCCAATGTTT  |
| <i>Cdkn1a</i> | U24174               | TCCACAGCGATATCGAGACA   | GCTCAACTGCTCACTGTCCA    |
| <i>Slpi</i>   | NM_053372            | GAATCCTGTTCCCATTCGTG   | TTCCCACACATACCCTCACA    |
| <i>Rhox5</i>  | NM_022175            | TGGGTGATGTGAAAGCAGAG   | GAACACCAGGACCAAAGTGG    |
| <i>Naprt1</i> | BF416417             | ATACCAGGTCGCATTGTCAGAG | ATGACACGTGGCTGACAAAAGTT |
| <i>Col6a2</i> | AI030021             | TGCCACACTGTCCCTAATGA   | CCACTAGGCCATCTGAGAGC    |
| <i>Ptqfrn</i> | NM_019243            | AGCCCGTCAACATATTCTGG   | TGGAAGACACTTTGCAAGTCA   |
| <i>Sulf1</i>  | NM_134378            | GTTGCAGGCAAATCCAAGT    | TTGCCAAATTCACCTTCTCC    |
| <i>Clu</i>    | AF314657             | CAGCTGGCTAACCTCACACA   | TGTGATGGGGTCAGAGTCAA    |
| <i>Wnt2</i>   | BF556985             | CTCCCTCTGCTCTTGACCTG   | GACCTGGCACATTGTCACAC    |
| <i>Tgfbi</i>  | BG379319             | CTTTCCTGGACGATGGACTG   | ACAGATCTGGCGGTCGTATC    |
| <i>Slit3</i>  | BF386446             | ACATGGAGGATTGACGTGTG   | ATTTCTCAGGGGTGATGGTG    |
| <i>Foxp1</i>  | AI072641             | CCTGAAGGTTTGCTGTGCTT   | CTGGCTACTGCCTGCACAT     |
| <i>Rsad2</i>  | AF134409             | CCCAGAGCAATCACTGAGGT   | GTCCTGCAGGACAGAAGCA     |

**Suppl Table 2. Primers used for qRT-PCR analyses of steroidogenesis enzymes**

| <b>Symbol</b>  | <b>Accession No.</b> | <b>Forward primer</b> | <b>Reverse primer</b> |
|----------------|----------------------|-----------------------|-----------------------|
| <i>Akr1c18</i> | NM_138510            | GGAGGCCATGGAGAAGTGTA  | ATGGCATTCTACCTGGTTGC  |
| <i>Cyp11a1</i> | NM_017286            | ACCTATTCCGCTTTGCCTTT  | CATGTTGAGCATGGGAACAC  |
| <i>Cyp17a1</i> | NM_012753            | GACCTGTCCACGCCTATCTT  | TCGAACTTCTCCCTGCACTT  |
| <i>Cyp19a1</i> | NM_017085            | TTAACGAGAGCCTGCGGTAT  | ACTCGAGCCTGTGCATTCTT  |
| <i>Hsd3b1</i>  | NM_001007719         | GGTGCAGGAGAAAGAAGTGC  | TGGGCATCCAGAATATCTCC  |
| <i>Hsd17b2</i> | NM_024391            | GTCACCAAGCCAGAGCAGAT  | AAGACCCCAGCATTGTTGAC  |

**Suppl Table 3. Primers used for qRT-PCR analyses of decidual differentiation**

| <b>Symbol</b> | <b>Accession No.</b> | <b>Forward primer</b> | <b>Reverse primer</b> |
|---------------|----------------------|-----------------------|-----------------------|
| <i>Prl</i>    | NM_012629            | ATCAATGACTGCCCCACTTC  | ATTCCAGGAGTGCACCAAAC  |
| <i>Prl6a1</i> | M31155               | CCAACAGAGGCTGGGTGTAT  | GGGGGTTCTCCATATGACT   |
| <i>Prl8a2</i> | NM_022846            | ATCCAGCGAGCTGAAGTCAT  | ATGCCTATACATGCGTGCAA  |
| <i>Prl3c1</i> | NM_031316            | GGATTCAGCCTGGAATTGAA  | TTGCGCAAGCAGTAGAAGAA  |
| <i>Gja1</i>   | NM_012567            | CCTTTGACTTCAGCCTCCAA  | CTTGGACCTTGTCCAGAAGC  |



**Suppl Table 4. Primers used for qRT-PCR analyses of P4 and E2 responsive genes**

| <b>Symbol</b> | <b>Accession No.</b> | <b>Forward primer</b> | <b>Reverse primer</b> |
|---------------|----------------------|-----------------------|-----------------------|
| <i>Ihh</i>    | NM_053384            | GAGCTCACCCCAACTACAA   | TGACAGAGATGGCCAGTGAG  |
| <i>S100g</i>  | NM_012521            | ATCCAAACCAGCTGTCCAAG  | TCCATCACCGTTCTTATCCAG |
| <i>Calca</i>  | NM_017338            | CCTTTCCTGGTTGTCAGCAT  | GGCGAGCTTCTTCTTCACTG  |
| <i>Areg</i>   | NM_017123            | CCGGCTATATTGTGGACGAC  | CCTGTTTCTTCTGCCTTTTCC |

**Suppl Table 5. Primers used for qRT-PCR analyses of the P4 signaling pathway**

| <b>Symbol</b>  | <b>Accession No.</b> | <b>Forward primer</b> | <b>Reverse primer</b>  |
|----------------|----------------------|-----------------------|------------------------|
| <i>Pgr A/B</i> | NM_022847            | CTACCTGAGGCCAGATTCAG  | CCTCTTAAAGAAGACCTTGCA  |
| <i>Pgr B</i>   | NM_022847            | GAAGAAGCAGAAATCCCAGAG | CCAAAGAGACACCAAGAAGTG  |
| <i>Fkbp4</i>   | XM_342763            | AGAAGCTGGAGCAGAGCAAC  | GGACCTTTTGCATTTCTCA    |
| <i>Hsp90</i>   | NM_175761            | CTGCGTATTTGGTTGCTGAG  | CATTGGTTCACCTGTGTCTG   |
| <i>Ncoa1</i>   | NM_001108012         | AATCGACTAGCACCATCTCTG | ATGAACTTCACACCTGGGAG   |
| <i>Ncoa2</i>   | NM_031822            | CAAAGTCCATGGTGAATGGG  | ATCGTCTCGTATTTCTGATGTG |

**Suppl Table 6. *Pgr* coding sequence (PCR using cDNA)**

| <b>Primer</b> | <b>Amplicon</b> | <b>Primer Sequence</b> |
|---------------|-----------------|------------------------|
| +770 Fwd      | +770 to +1739   | GTCTCGCCAATACCGATCTC   |
| +1739 Rev     | +770 to +1739   | CCTCTTTAGGGTCGCCTTCT   |
| +1632Fwd      | +1632 to +2606  | AAGTCCCTTTTGCTCCACCT   |
| +2606 Rev     | +1632 to +2606  | CCAGGGTCTGGCTCTCATTA   |
| +2493 Fwd     | +2493 to +3475  | TGGTCCTTGGAGGTCGTAAG   |
| +3475Rev      | +2493 to +3475  | GAGCTGACTGTCCTGACTGAGA |

**Suppl Table 7. Sequence upstream of transcription start site and 5' flanking region (PCR using genomic DNA)**

| <b>Primer</b> | <b>Amplicon</b> | <b>Primer Sequence</b>  |
|---------------|-----------------|-------------------------|
| -1308 Fwd     | -1308 to -474   | CCCAATGGTCCAATGTGACAG   |
| -474 Rev      | -1308 to -474   | GTGGCTGGACAGGTAGCCAGTAA |
| -662 Fwd      | -662 to +196    | CCTCTGAAGGAGCAGCAAGT    |
| +196 Rev      | -662 to +196    | CACCAAAACCCTGGGACTAAGA  |
| +82 Fwd       | +82 to +1060    | AGACCAACCTGCAACCAGAACT  |
| +1060 Rev     | +82 to +1060    | GCCCAAAGAGACACCAAGAAGT  |
